# Supplementary material for: Pyridine nitrogen position controlled molecular packing and stimuli-responsive solid-state fluorescence switching: supramolecular complexation facilitated turn-on fluorescence
Source: Royal Society of Chemistry journal article supplement (doi:10.1039/d1ce01688a), 2022-01-01
Supplement: d1ce01688a1.pdf [file d1ce01688a1.pdf]

## Electronic Supplementary Information (ESI)

### Pyridine Nitrogen Position Controlled Molecular Packing and Stimuli-responsive Solid-State Fluorescence Switching: Supramolecular Complexation Facilitated Turn-on Fluorescence

Parthasarathy Gayathri,<sup>a</sup> Sasikala Ravi,<sup>a</sup> Karthikeyan,<sup>b</sup> Mehboobali Pannipara,<sup>c,d</sup> Abdullah G. Al-Sehemi,<sup>c,d</sup> Dohyun Moon\*<sup>e</sup> Savarimuthu Philip Anthony\*<sup>a</sup>

<sup>a</sup>)School of Chemical & Biotechnology, SASTRA Deemed University, Thanjavur-613401, Tamil Nadu, India. Fax: +914362264120; Tel: +914362264101; E-mail: philip@biotech.sastra.edu

<sup>b</sup>)PG and Research Department of Chemistry, Khadir Mohideen College, Adirampattinam-614701, Tamil Nadu, India.

<sup>c</sup>) Research center for Advanced Materials Science, King Khalid University, Abha 61413, Saudi Arabia.

<sup>d</sup>) Department of chemistry, King Khalid University, Abha 61413, Saudi Arabia.

<sup>e</sup>)Beamline Department, Pohang Accelerator Laboratory, 80 Jigokro-127beongil, Nam-gu, Pohang, Gyeongbuk, Korea, Email: dmoon@postech.ac.kr

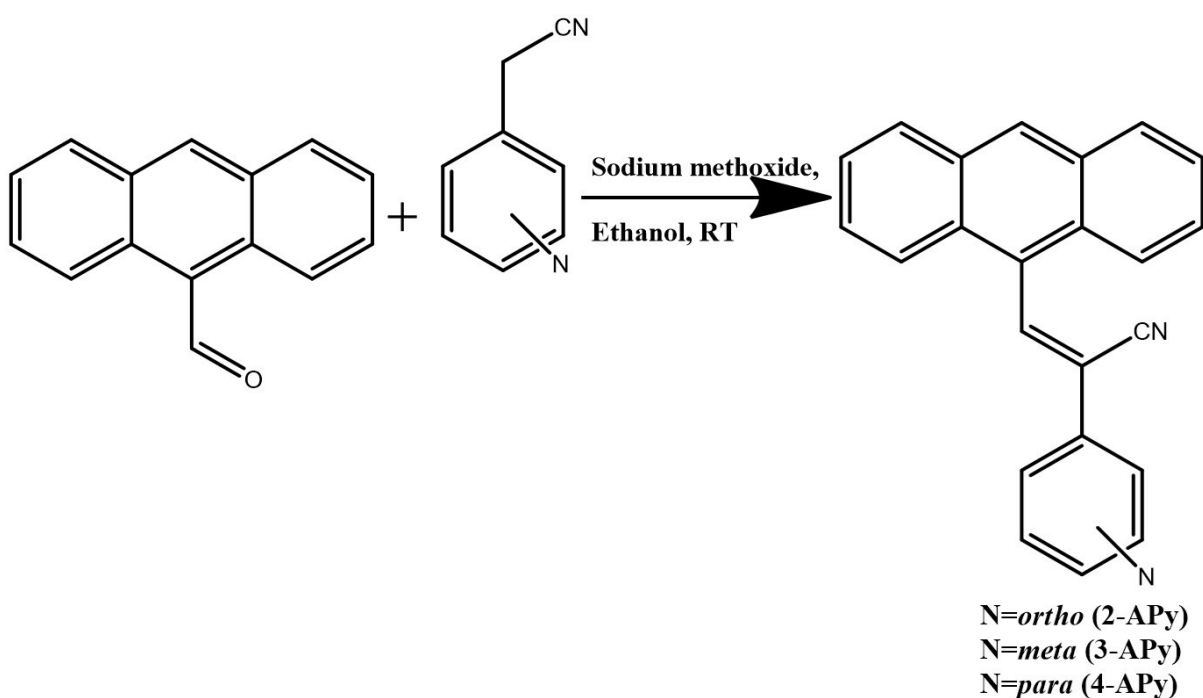

Scheme S1. Synthesis of 2-APy, 3-APy and 4-APy.

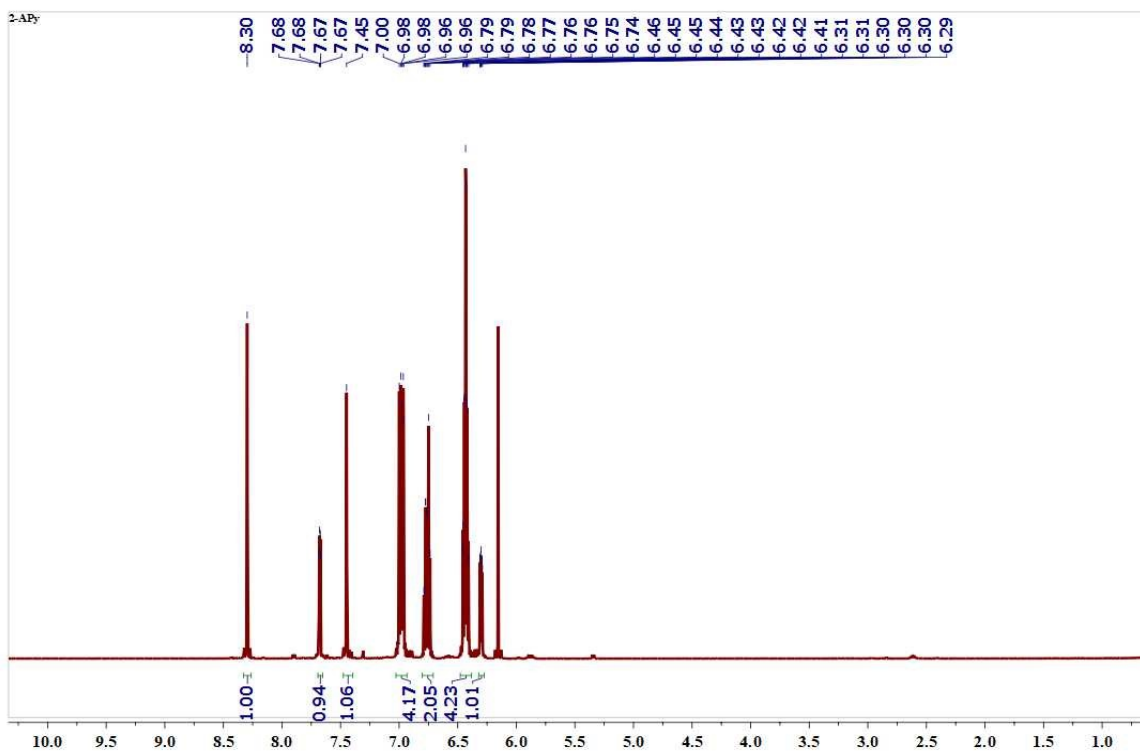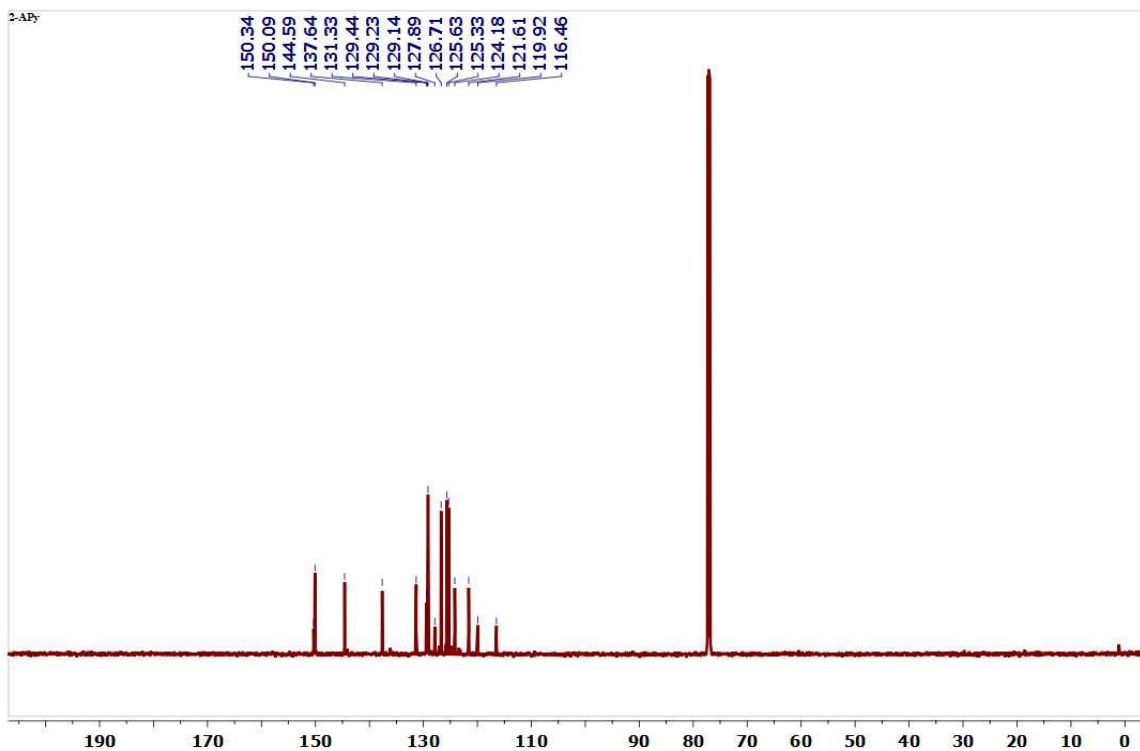

# $^1\text{H}$ and $^{13}\text{C}$ NMR of 2-APy

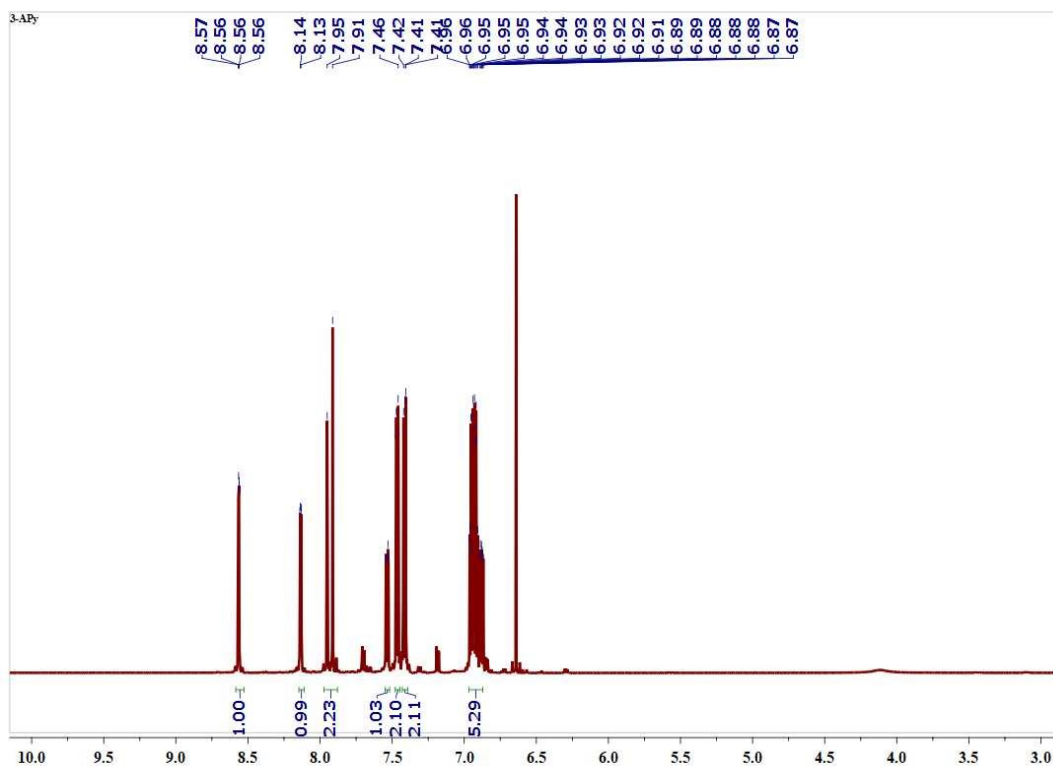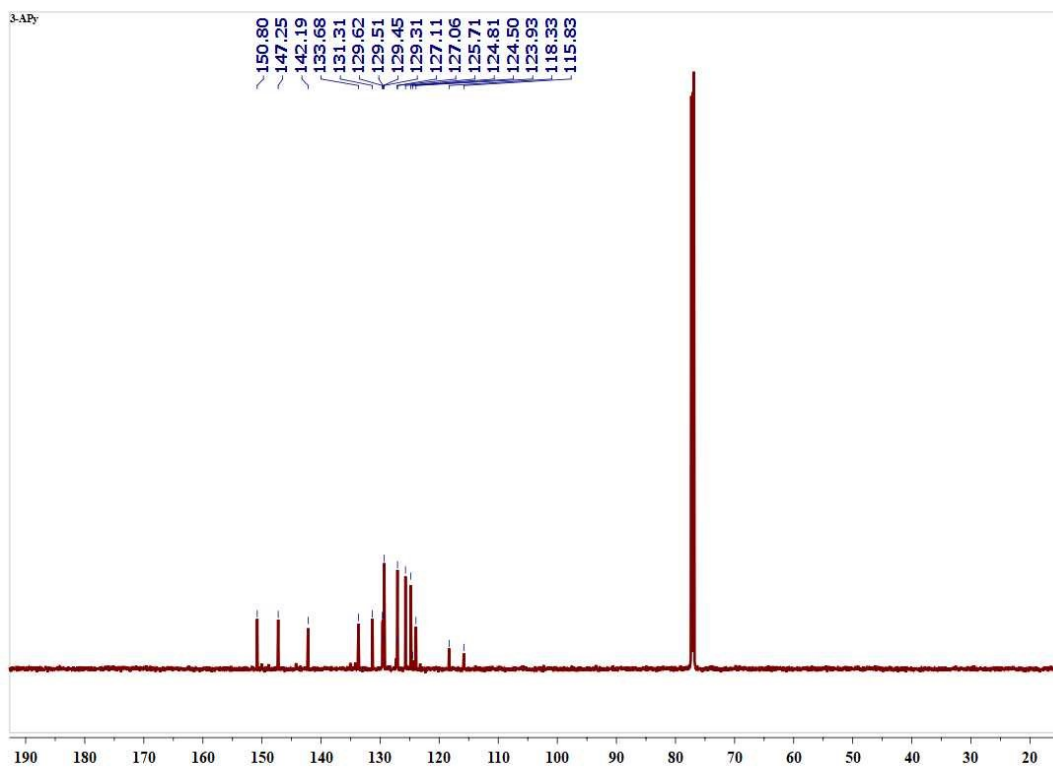

$^1\text{H}$  and  $^{13}\text{C}$  NMR of **3-APy**

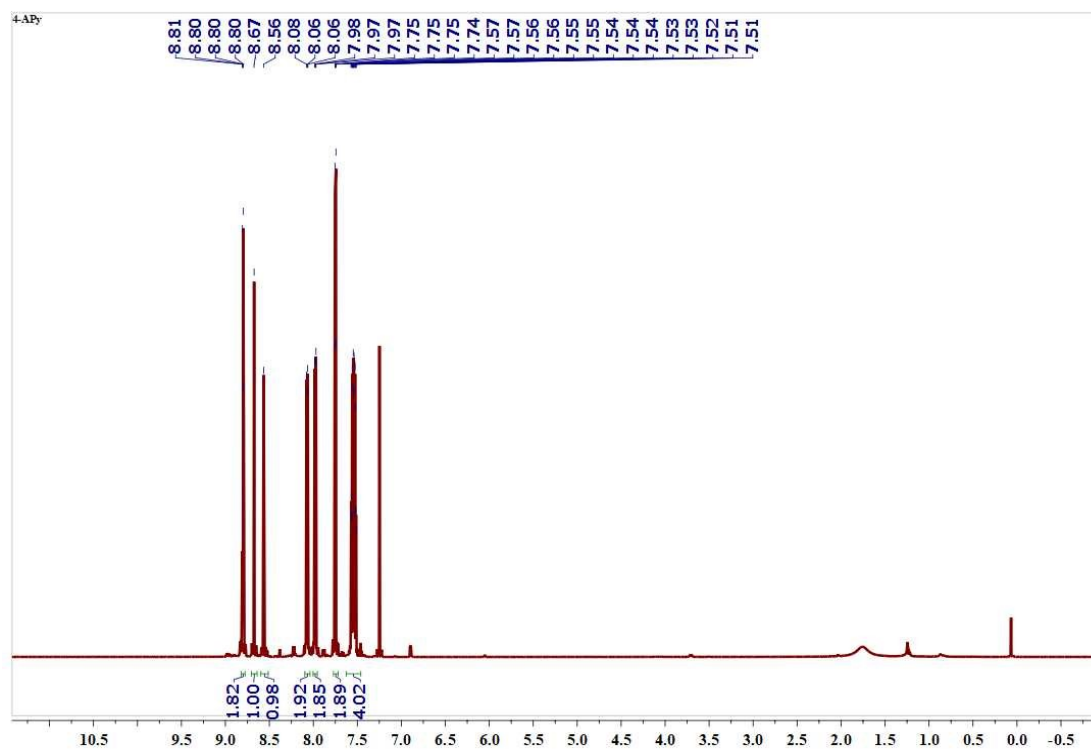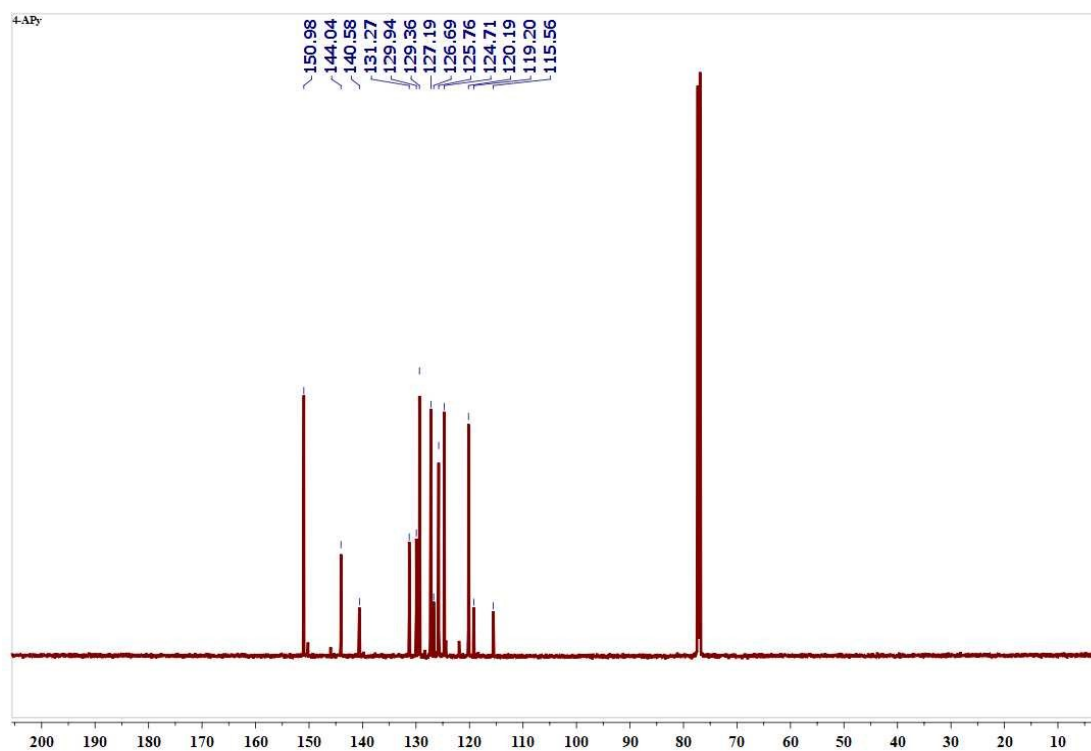

$^1\text{H}$  and  $^{13}\text{C}$  NMR of 4-APy

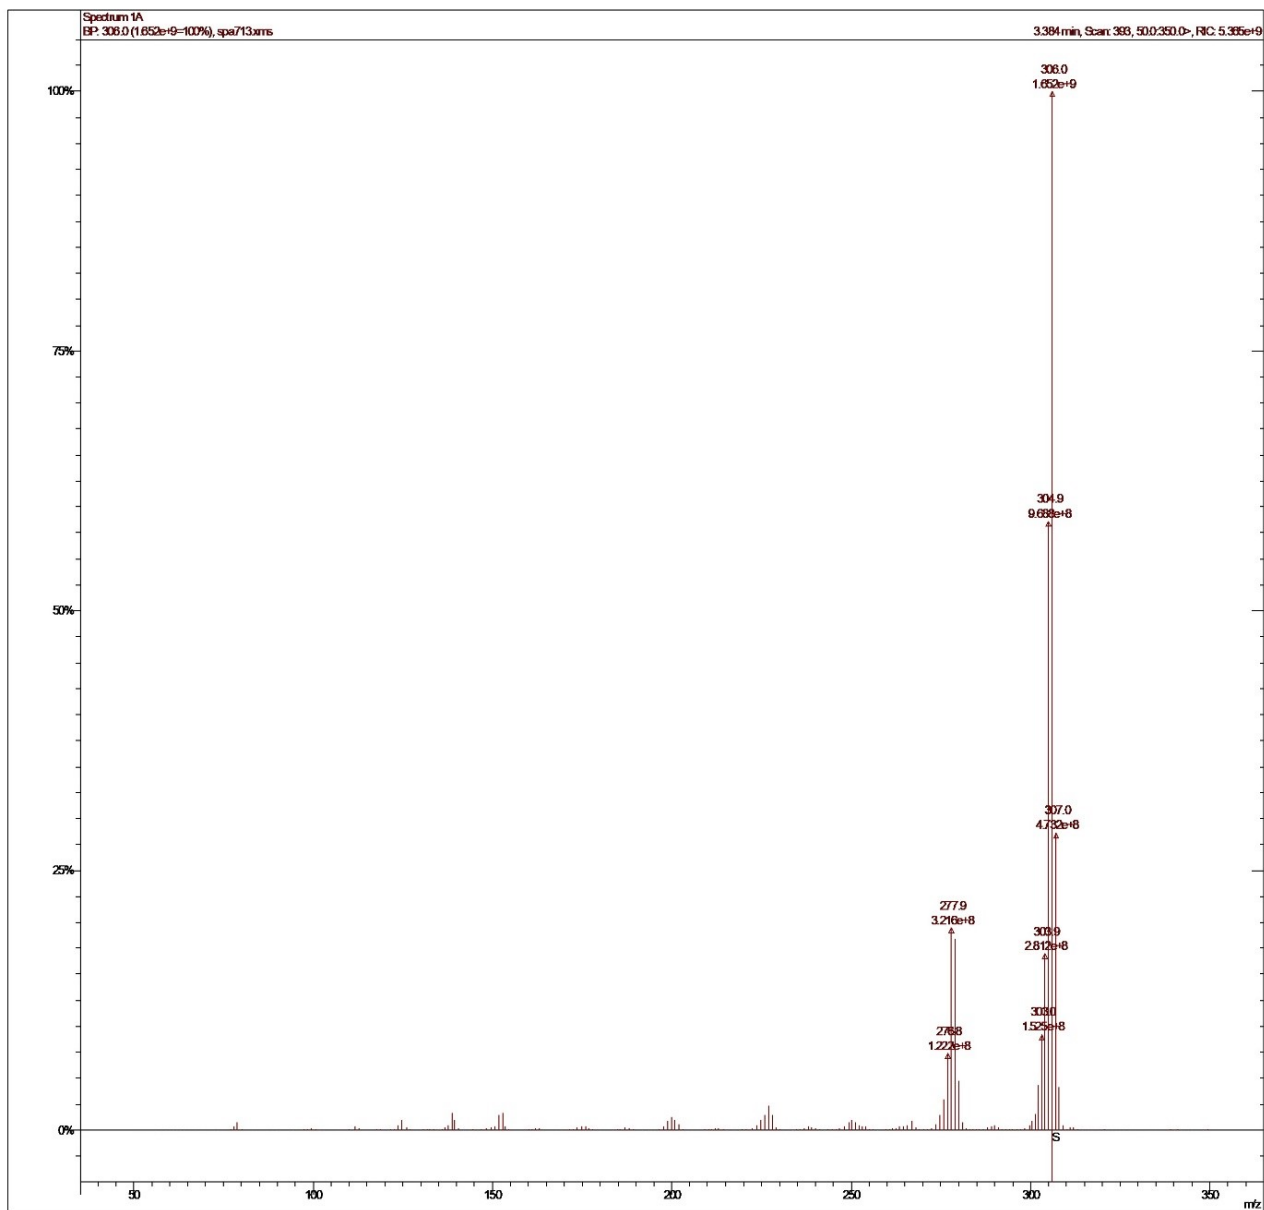

**2-APy:** m/z calcd for  $\text{C}_{22}\text{H}_{14}\text{N}_2$  (M + H): 306.12, found: 306.0

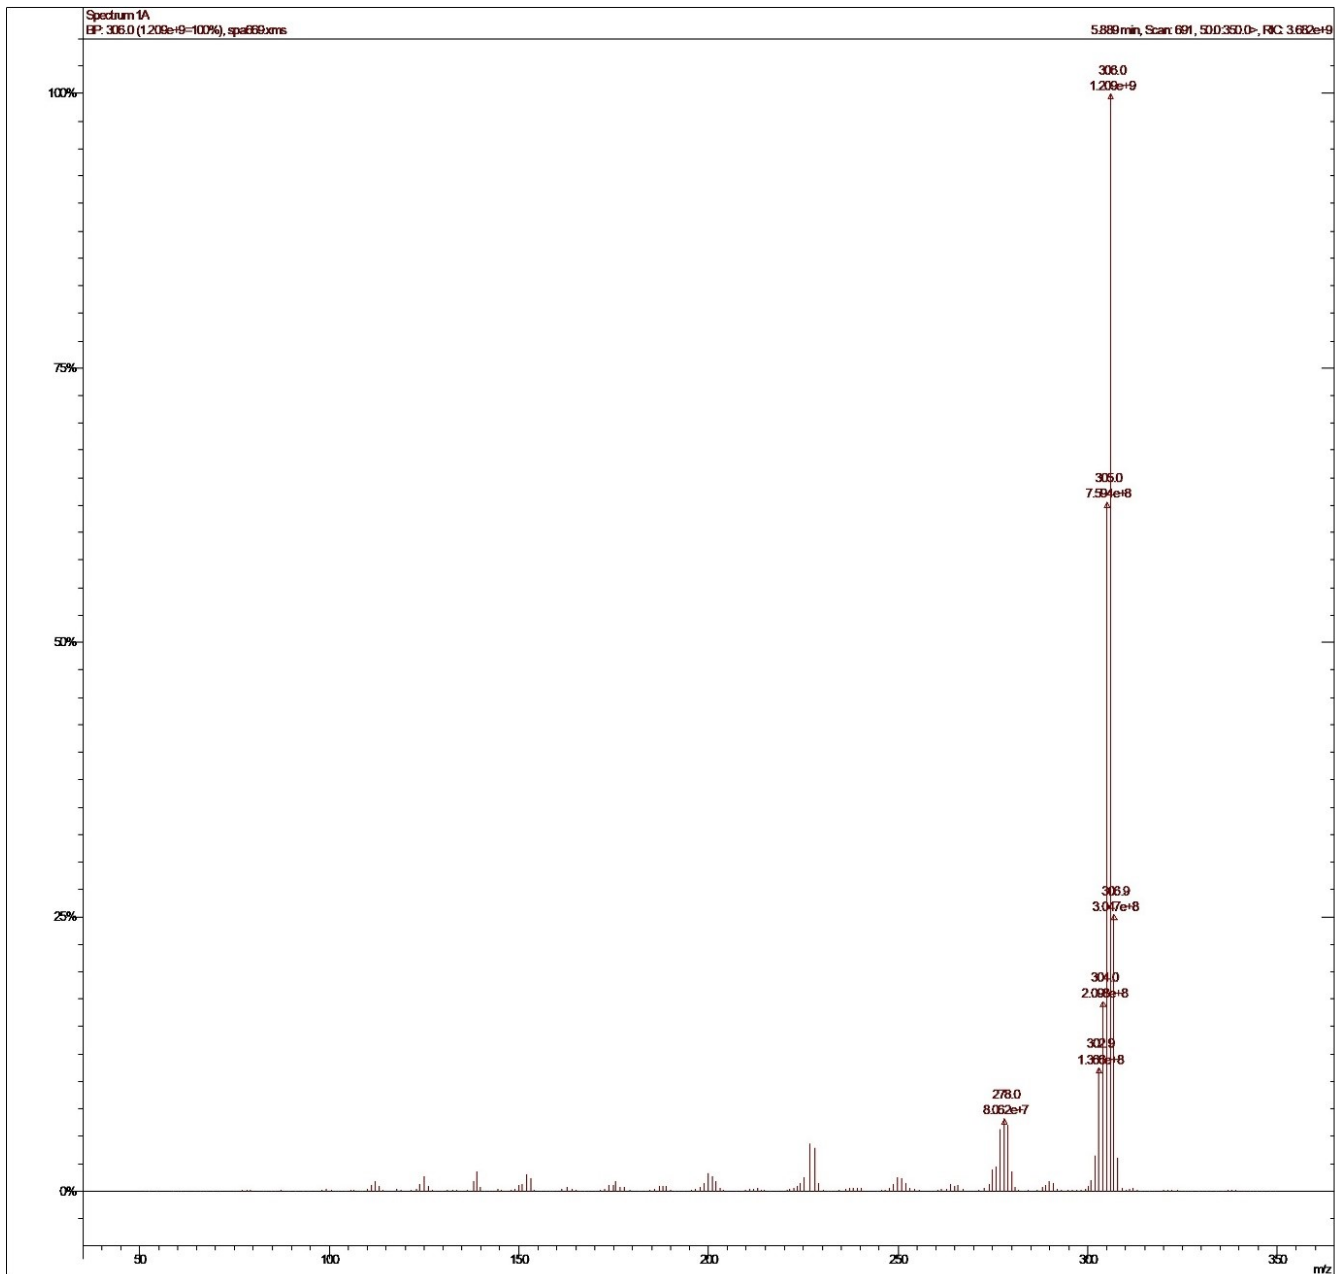

**3-APy:** m/z calcd for  $C_{22}H_{14}N_2$  (M + H): 306.12, found: 306.0

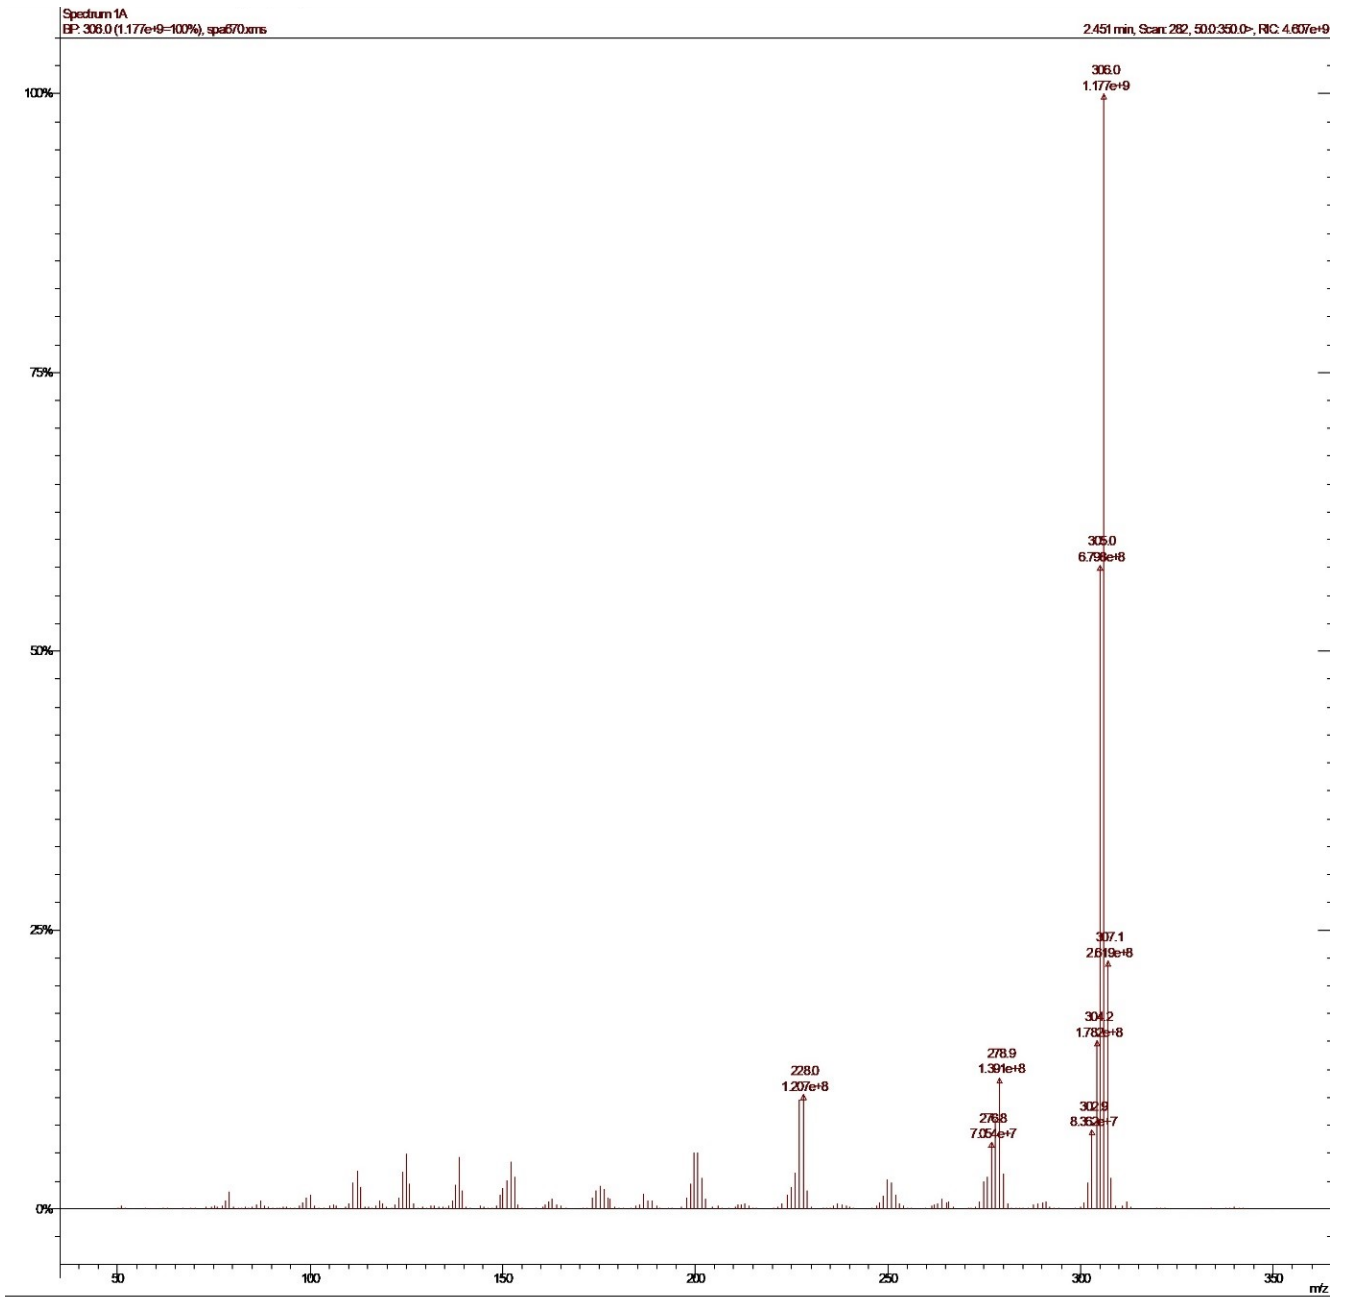

**4-APy:** m/z calcd for  $C_{22}H_{14}N_2$  (M + H): 306.12, found: 306.0

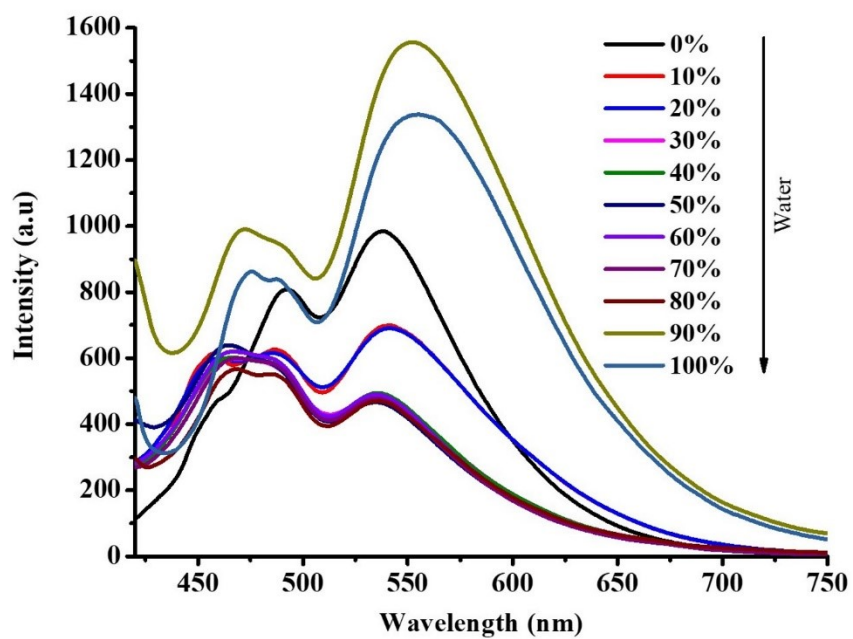

Fig. S1. Aggregation enhanced emission studies of 3-APy in THF/water mixture.

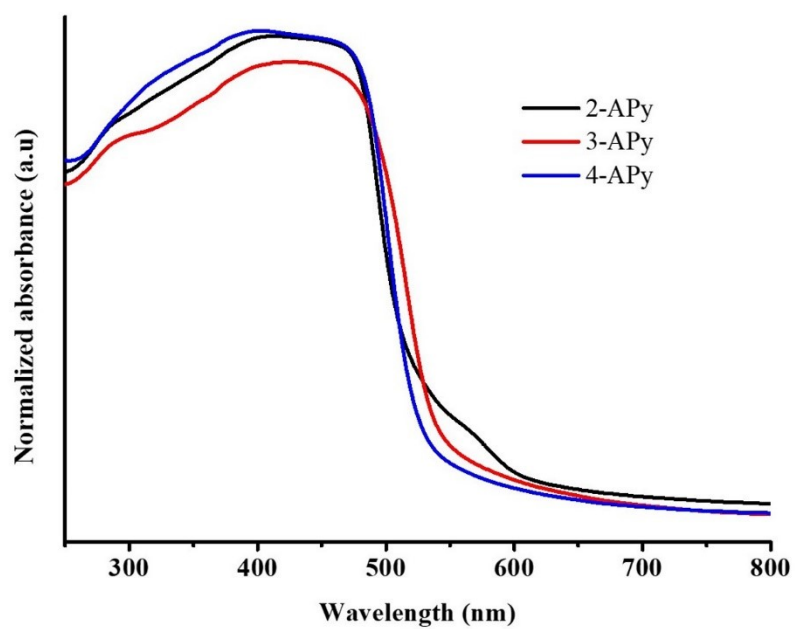

Fig. S2. Solid state absorption spectra of 2-APy, 3-APy and 4-APy.



Table S1. Comparison of conformational twist using dihedral angle ( $\tau$ ) in all four structures.

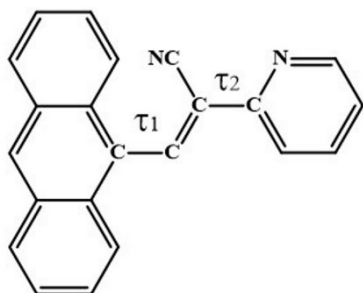

|                   | $\tau_1$ (°) | $\tau_2$ (°) |
|-------------------|--------------|--------------|
| <b>2-APy</b>      | 0.71         | 7.37         |
| <b>3-APy</b>      | 3.70         | 18.43        |
| <b>4-APy</b>      | 0.26         | 24.76        |
| <b>2-APy-PTSA</b> | 4.13         | 13.64        |

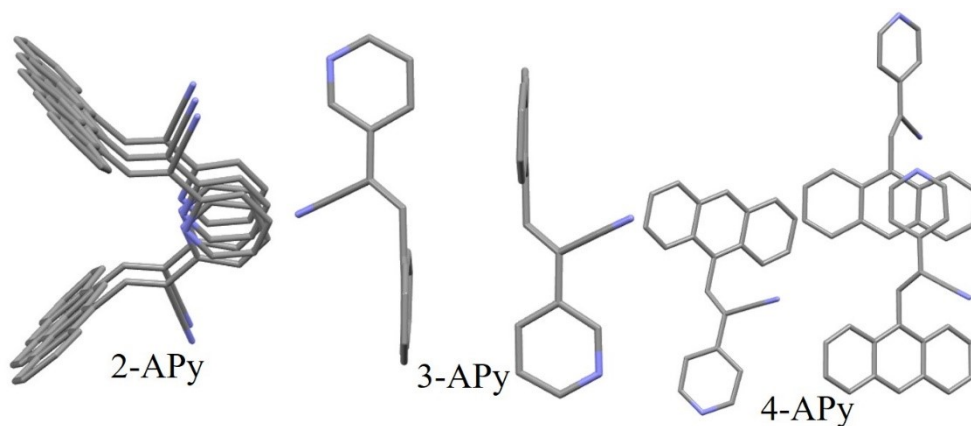

Fig. S3. Molecular stacking in the crystal lattice of 2-APy, 3-APy and 4-APy. C (grey), H (white) and N (blue).

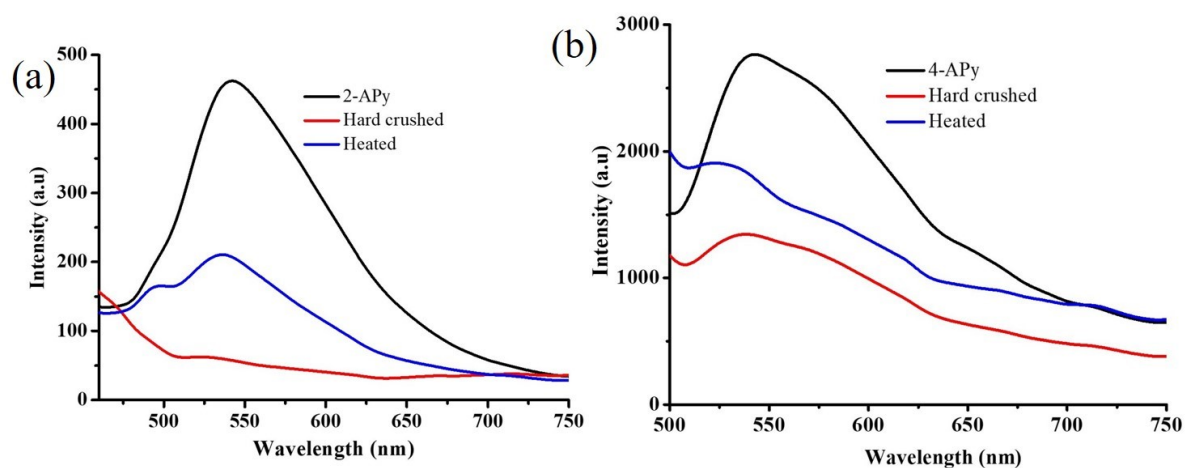

Fig. S4. Mechanofluorochromism of (a) **2-APy** and (b) **4-APy**.

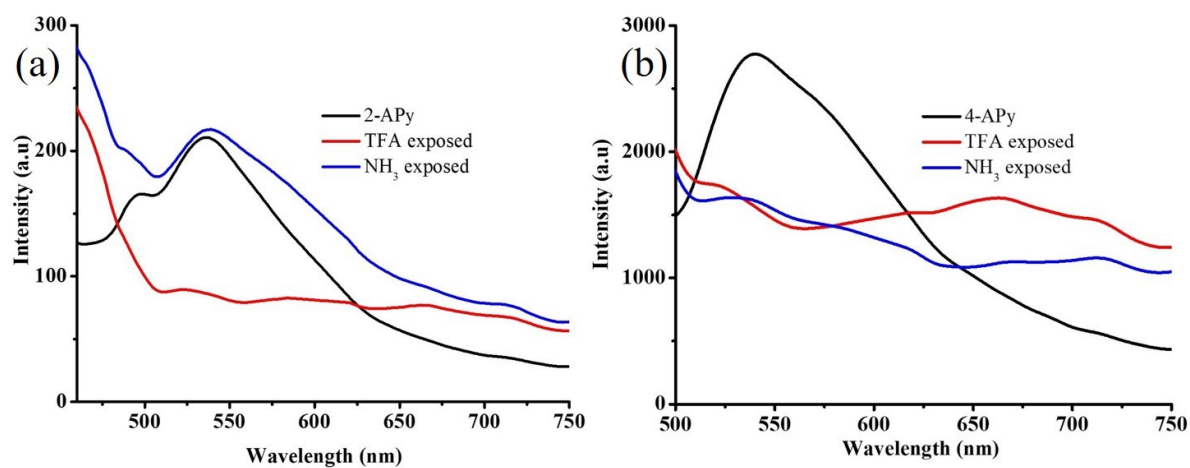

Fig. S5. Halochromism of (a) **2-APy** and (b) **4-APy**.

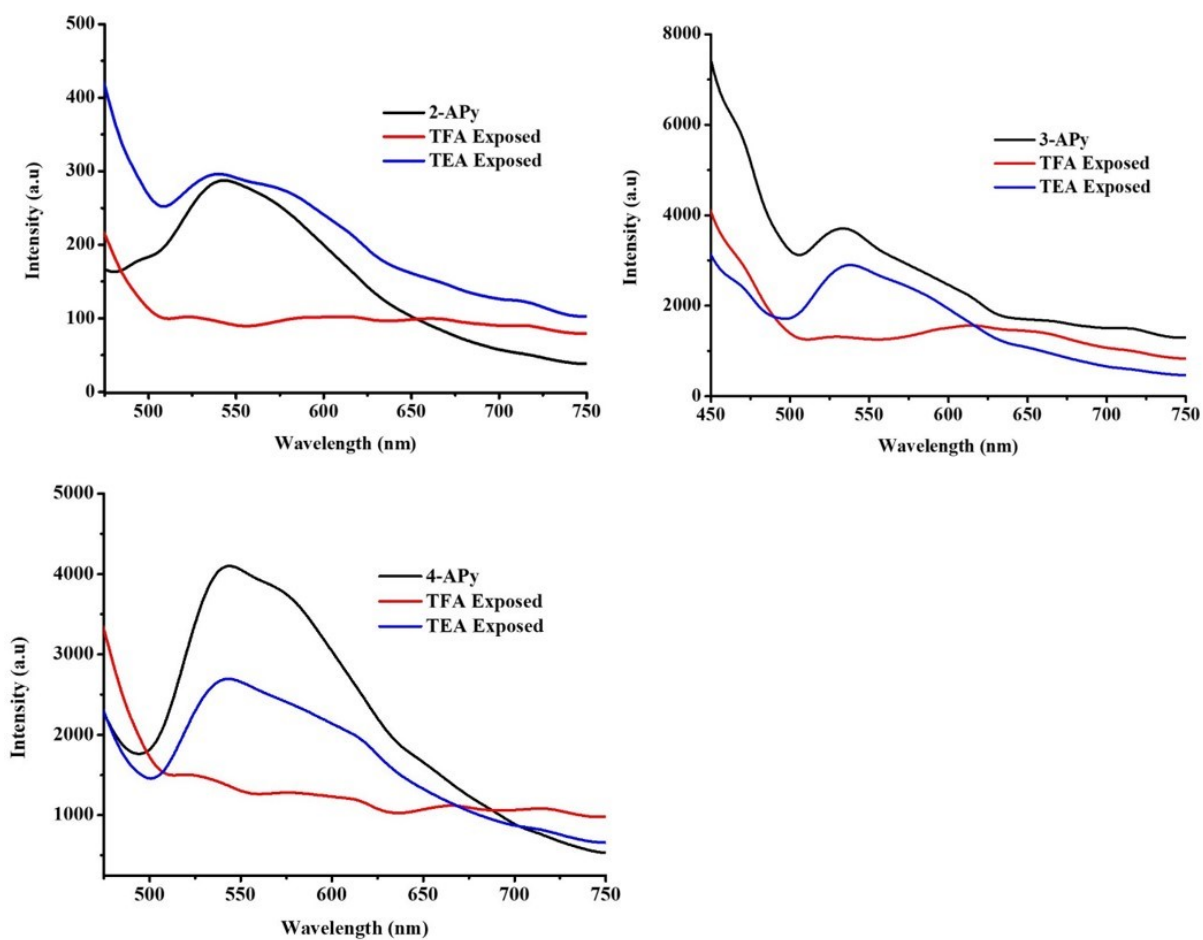

Fig. S6. Halochromism of **2-APy**, **3-APy** and **4-APy** by treating with TFA and triethylamine (TEA).
